# Supplementary material
Source: publisher site journal article supplement (https://www.dovepress.com/article/225761)
Supplement: Supplementary file 1 [file get_supplementary_file.php]

Supplementary table 1. Correlations between clinical variables and total PS+MPs as well as TF+PS+MPs in T1DM patients.

|  | Total PS+MPs | | TF+PS+MPs | |
| --- | --- | --- | --- | --- |
| Variable | r | *P* value | r | *P* value |
| Age | 0.034 | 0.846 | 0.126 | 0.462 |
| BMI | 0.126 | 0.462 | 0.135 | 0.431 |
| WHR | -0.002 | 0.992 | 0.027 | 0.874 |
| SBP | 0.171 | 0.318 | 0.044 | 0.799 |
| DBP | 0.096 | 0.578 | 0.154 | 0.371 |
| Cr | 0.177 | 0.303 | 0.327 | 0.051 |
| TG | 0.131 | 0.271 | 0.060 | 0.616 |
| TC | -0.135 | 0.431 | -0.079 | 0.648 |
| LDL-C | -0.237 | 0.165 | -0.001 | 0.995 |
| HDL-C | -0.296 | 0.080 | -0.221 | 0.195 |
| FBG | 0.125 | 0.466 | -0.043 | 0.801 |
| hs-CRP | 0.004 | 0.982 | -0.167 | 0.329 |
| HbA1c | 0.051 | 0.770 | -0.135 | 0.431 |
| UACR | 0.064 | 0.709 | 0.196 | 0.253 |

Supplementary table 2. Correlations between clinical variables and total PMPs as well and TF+PS+ PMPs.

|  | PMPs | | TF+PS+PMPs | |
| --- | --- | --- | --- | --- |
| Variable | r | *P* value | r | *P* value |
| Age | 0.026 | 0.880 | -0.026 | 0.880 |
| BMI | 0.044 | 0.797 | 0.150 | 0.383 |
| WHR | -0.074 | 0.668 | -0.112 | 0.516 |
| SBP | 0.296 | 0.080 | -0.067 | 0.700 |
| DBP | 0.178 | 0.299 | -0.070 | 0.686 |
| Cr | -0.065 | 0.706 | -0.229 | 0.179 |
| TG | 0.035 | 0.770 | 0.166 | 0.164 |
| TC | -0.115 | 0.506 | 0.233 | 0.172 |
| LDL-C | -0.172 | 0.317 | 0.219 | 0.200 |
| HDL-C | 0.042 | 0.809 | 0.157 | 0.361 |
| FBG | -0.188 | 0.272 | 0.159 | 0.353 |
| hs-CRP | 0.007 | 0.967 | 0.272 | 0.108 |
| HbA1c | -0.112 | 0.516 | 0.202 | 0.238 |
| UACR | -0.071 | 0.679 | -0.196 | 0.252 |

Supplementary table 3. Correlations between clinical variables and total RMPs as well and T TF+PS+ RMPs.

|  | RMPs | | TF+PS+MPs | |
| --- | --- | --- | --- | --- |
| Variable | r | *P* value | r | *P* value |
| Age | 0.178 | 0.299 | 0.156 | 0.365 |
| BMI | 0.277 | 0.102 | -0.257 | 0.130 |
| WHR | 0.236 | 0.166 | -0.138 | 0.423 |
| SBP | -0.105 | 0.541 | 0.139 | 0.418 |
| DBP | -0.098 | 0.570 | -0.076 | 0.660 |
| Cr | -0.138 | 0.421 | -0.122 | 0.480 |
| TG | 0.223 | 0.060 | 0.124 | 0.298 |
| TC | 0.102 | 0.553 | 0.062 | 0.718 |
| LDL-C | 0.104 | 0.546 | 0.093 | 0.590 |
| HDL-C | -0.083 | 0.631 | 0.069 | 0.688 |
| FBG | 0.298 | 0.077 | 0.107 | 0.533 |
| hs-CRP | 0.115 | 0.504 | -0.271 | 0.110 |
| HbA1c | -0.057 | 0.741 | -0.086 | 0.617 |
| UACR | -0.008 | 0.962 | 0.113 | 0.513 |

Supplementary table 4. Correlations between clinical variables and total TMPs as well and TF+PS+TMPs.

|  | TMPs | | TF+PS+TMPs | |
| --- | --- | --- | --- | --- |
| Variable | r | *P* value | r | *P* value |
| Age | -0.051 | 0.766 | -0.035 | 0.838 |
| BMI | -0.167 | 0.331 | -0.172 | 0.317 |
| WHR | -0.144 | 0.401 | -0.095 | 0.583 |
| SBP | 0.314 | 0.062 | 0.211 | 0.216 |
| DBP | 0.157 | 0.359 | 0.002 | 0.989 |
| Cr | 0.083 | 0.631 | 0.101 | 0.556 |
| TG | 0.167 | 0.161 | 0.148 | 0.216 |
| TC | -0.052 | 0.764 | -0.094 | 0.584 |
| LDL-C | 0.004 | 0.981 | -0.028 | 0.872 |
| HDL-C | -0.189 | 0.271 | -0.121 | 0.482 |
| FBG | 0.301 | 0.074 | 0.291 | 0.085 |
| hs-CRP | -0.119 | 0.489 | -0.104 | 0.546 |
| HbA1c | 0.073 | 0.673 | 0.008 | 0.963 |
| UACR | 0.072 | 0.677 | -0.038 | 0.825 |

Supplementary table 5. Correlations between clinical variables and total BMPs as well and TF+PS+BMPs.

|  | BMPs | | TF+PS+BMPs | |
| --- | --- | --- | --- | --- |
| Variable | r | *P* value | r | *P* value |
| Age | 0.043 | 0.805 | -0.200 | 0.243 |
| BMI | -0.022 | 0.899 | 0.123 | 0.474 |
| WHR | -2.45 | 0.149 | -0.050 | 0.771 |
| SBP | 0.241 | 0.157 | 0.328 | 0.051 |
| DBP | 0.068 | 0.694 | 0.100 | 0.563 |
| Cr | 0.076 | 0.660 | -0.044 | 0.801 |
| TG | 0.029 | 0.809 | 0.031 | 0.796 |
| TC | 0.221 | 0.195 | -0.007 | 0.966 |
| LDL-C | 0.158 | 0.358 | 0.063 | 0.713 |
| HDL-C | -0.017 | 0.921 | -0.276 | 0.104 |
| FBG | 0.289 | 0.087 | 0.156 | 0.363 |
| hs-CRP | 0.090 | 0.600 | -0.007 | 0.968 |
| HbA1c | 0.237 | 0.165 | 0.264 | 0.119 |
| UACR | 0.110 | 0.523 | 0.021 | 0.904 |

Supplementary table 6. Correlations between clinical variables and total MMPs as well and TF+PS+MMPs.

|  | MMP | | TF+PS+MMP | |
| --- | --- | --- | --- | --- |
| Variable | r | *P* value | r | *P* value |
| Age | -0.116 | 0.501 | -0.005 | 0.975 |
| BMI | 0.206 | 0.228 | -0.019 | 0.913 |
| WHR | -0.116 | 0.501 | -0.017 | 0.921 |
| SBP | -0.022 | 0.898 | -0.182 | 0.288 |
| DBP | 0.032 | 0.855 | -0.017 | 0.922 |
| Cr | 0.040 | 0.818 | -0.069 | 0.689 |
| TG | 0.019 | 0.875 | 0.106 | 0.376 |
| TC | -0.114 | 0.506 | 0.060 | 0.727 |
| LDL-C | -0.021 | 0.904 | 0.049 | 0.775 |
| HDL-C | -0.188 | 0.271 | 0.095 | 0.583 |
| FBG | 0.255 | 0.133 | 0.210 | 0.219 |
| hs-CRP | 0.105 | 0.541 | 0.130 | 0.449 |
| HbA1c | 0.197 | 0.250 | 0.108 | 0.531 |
| UACR | -0.309 | 0.066 | -0.012 | 0.942 |

Supplementary table 7. Correlations between clinical variables and total EMPs as well and TF+PS+EMPs.

|  | EMP | | TF+PS+EMP | |
| --- | --- | --- | --- | --- |
| Variable | r | *P* value | r | *P* value |
| Age | 0.039 | 0.821 | 0.006 | 0.974 |
| BMI | 0.042 | 0.810 | 0.189 | 0.271 |
| WHR | 0.361 | 0.031 | 0.056 | 0.746 |
| SBP | 0.230 | 0.177 | 0.234 | 0.170 |
| DBP | 0.204 | 0.232 | 0.113 | 0.511 |
| Cr | 0.017 | 0.920 | 0.198 | 0.247 |
| TG | -0.097 | 0.419 | -0.110 | 0.357 |
| TC | -0.256 | 0.131 | -0.244 | 0.152 |
| LDL-C | -0.065 | 0.705 | -0.194 | 0.257 |
| HDL-C | -0.342 | 0.041 | -0.308 | 0.067 |
| FBG | 0.028 | 0.873 | 0.174 | 0.309 |
| hs-CRP | -0.149 | 0.386 | -0.077 | 0.655 |
| HbA1c | -0.161 | 0.349 | 0.014 | 0.937 |
| UACR | -0.134 | 0.437 | 0.245 | 0.149 |

T1DM: type 1 diabetes mellitus; BMI: body mass index; WHR: waist-hip-ratio; SBP: systolic blood pressure; DBP: diastolic blood pressure; Cr: Serum creatinine; TG: triglyceride; TC: total cholesterol; LDL-C: low-density lipoprotein cholesterol; HDL-C: high-density lipoprotein cholesterol; FBG: fasting blood glucose; hs-CRP: highly sensitive C-reactive protein; HbA1c: glycated hemoglobin; UACR: urinary albumin-to-creatinine ratio; PS: phosphatidylserine; MPs: microparticles; PMPs: platelet-derived MPs; TF: tissue factor; RMPs: red blood cell-derived MPs; TMPs: T lymphocytes-derived MPs; BMPs: B lymphocytes-derived MPs; MMPs: monocytes-derived MPs; EMPs: endothelium-derived MPs.
